# Supplementary material for: Tuning multicolour emission of Zn2GeO4:Mn phosphors by Li+ doping for information encryption and anti-counterfeiting applications
Source: Royal Society of Chemistry journal article supplement (doi:10.1039/d1dt03563k), 2021-12-01
Supplement: d1dt03563k1.pdf [file d1dt03563k1.pdf]

**Tuning multicolor emission of  $\text{Zn}_2\text{GeO}_4\text{:Mn}$  phosphors by  $\text{Li}^+$  doping for  
information encryption and anti-counterfeiting applications**

Dangli Gao,<sup>\*a</sup> Kaiwei Ma,<sup>a</sup> Peng Wang,<sup>a</sup> Xiangyu Zhang,<sup>b</sup> Qing Pang,<sup>a</sup> Hong Xin,<sup>a</sup>

Zihan Zhang<sup>c</sup> and Huan Jiao<sup>\*c</sup>

<sup>a</sup> College of Science, Xi'an University of Architecture and Technology, Xi'an 710055,  
China

<sup>b</sup> College of Science, Chang'an University, Xi'an 710064, China

<sup>c</sup> School of Chemistry and Chemical Engineering, Shaanxi Normal University, Xi'an  
710062, China

E-mails: [gaodangli@163.com](mailto:gaodangli@163.com), [gaodangli@xauat.edu.cn](mailto:gaodangli@xauat.edu.cn), [jiaohuan@snnu.edu.cn](mailto:jiaohuan@snnu.edu.cn).

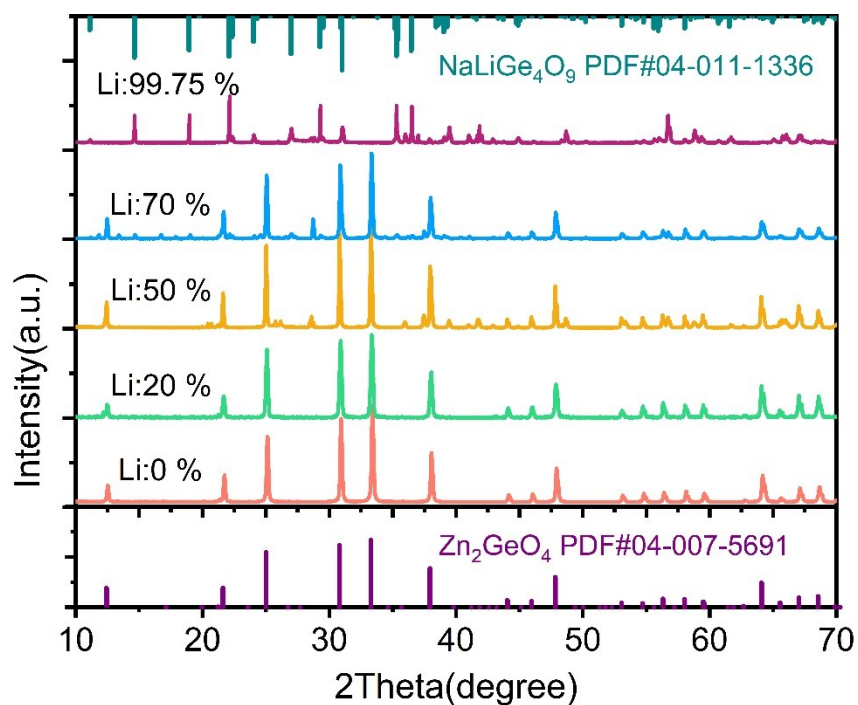

**Fig. S1** XRD patterns of Zn<sub>2</sub>GeO<sub>4</sub>:Mn, $x$ %Li ( $x=0$  and 20), Zn<sub>2</sub>GeO<sub>4</sub>-NaLiGe<sub>4</sub>O<sub>9</sub>:Mn,  $x$ %Li ( $x=50$  and 70) and NaLiGe<sub>4</sub>O<sub>9</sub>:Mn phosphors calcined at 900 °C. Note that the bottom of the panel is standard data for hexagonal Zn<sub>2</sub>GeO<sub>4</sub> (purple, PDF# 04-007-5691), and the top of the panel is orthorhombic NaLiGe<sub>4</sub>O<sub>9</sub>:0.25%Mn (green, PDF# 04-011-1336).

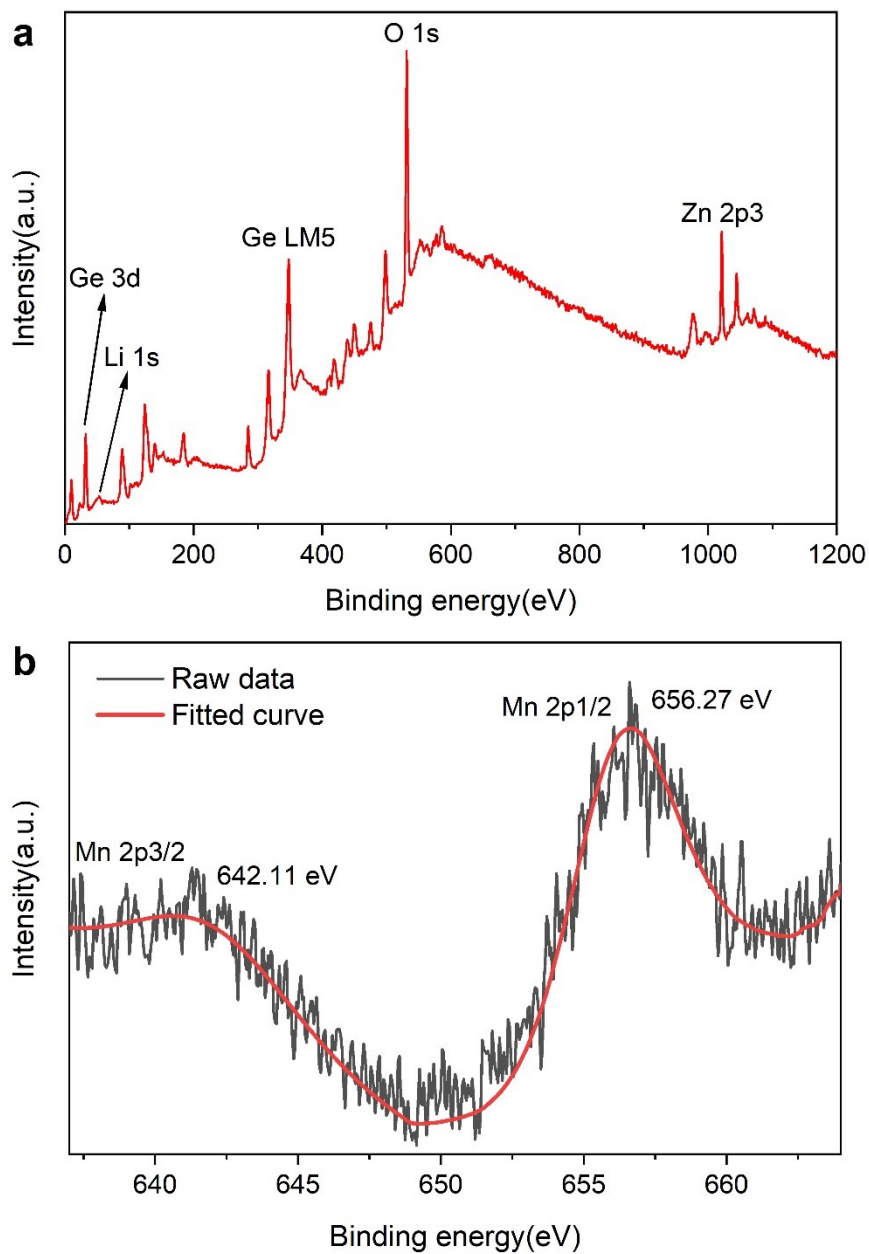

**Fig. S2** XPS survey scan spectrum (a) and high-resolution XPS spectrum of Mn 2p (b) in  $\text{Zn}_2\text{GeO}_4\text{-NaLiGe}_4\text{O}_9\text{:Mn}$ , 70%Li sample.

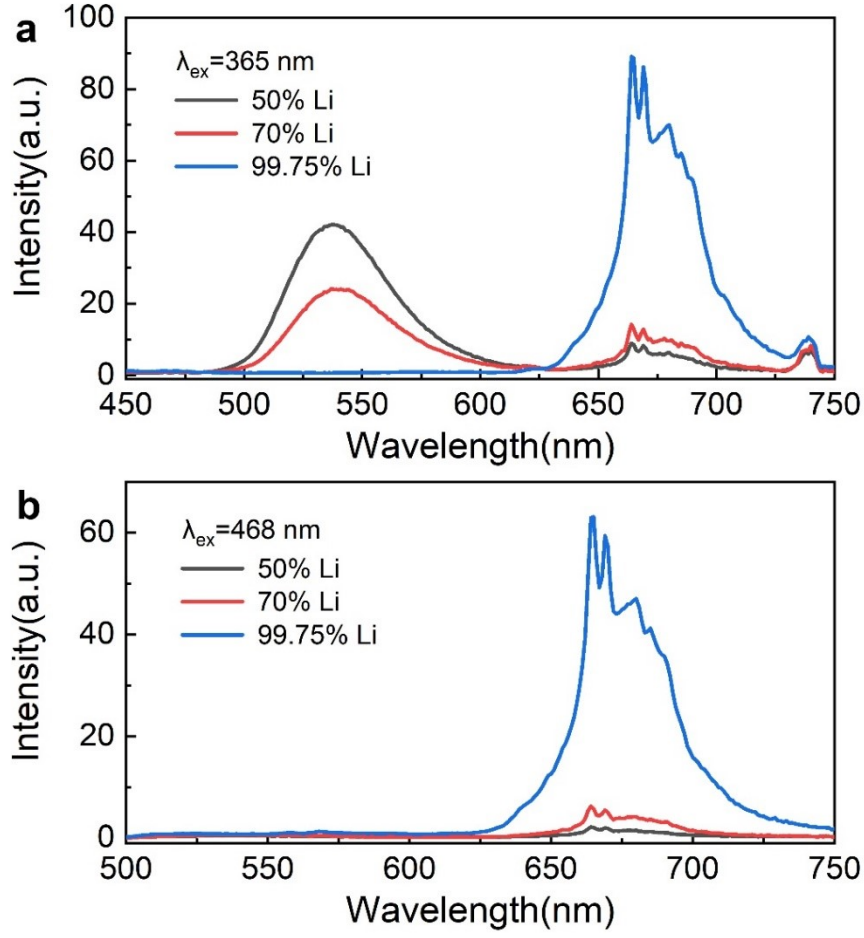

**Fig. S3**  $\text{Li}^+$  doping concentration dependent PL spectra of  $\text{Zn}_2\text{GeO}_4\text{-NaLiGe}_4\text{O}_9\text{:Mn}$ ,  $x\%\text{Li}$  ( $x=50$  and  $70$ ) and  $\text{NaLiGe}_4\text{O}_9\text{:Mn}$  phosphors under selective excitation with (a) 365 nm and (b) 468 nm, respectively. With the increase of  $\text{Li}^+$  ion doping concentrations and excitation wavelengths, the red luminescence increases.

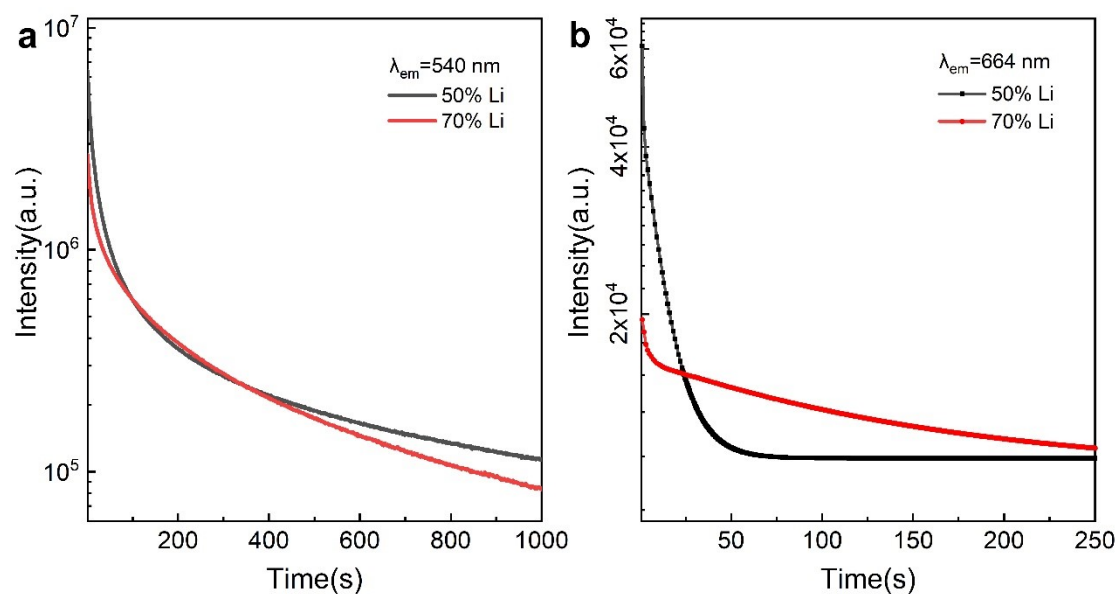

**Fig. S4** Li<sup>+</sup> doping concentration dependent PersL decay curves of Zn<sub>2</sub>GeO<sub>4</sub>-NaLiGe<sub>4</sub>O<sub>9</sub>:Mn, x%Li phosphors (x=50 and 70) phosphors monitored at 540 nm (a) and 664 nm (b) after irradiated by a 365 nm lamp for 5 min.

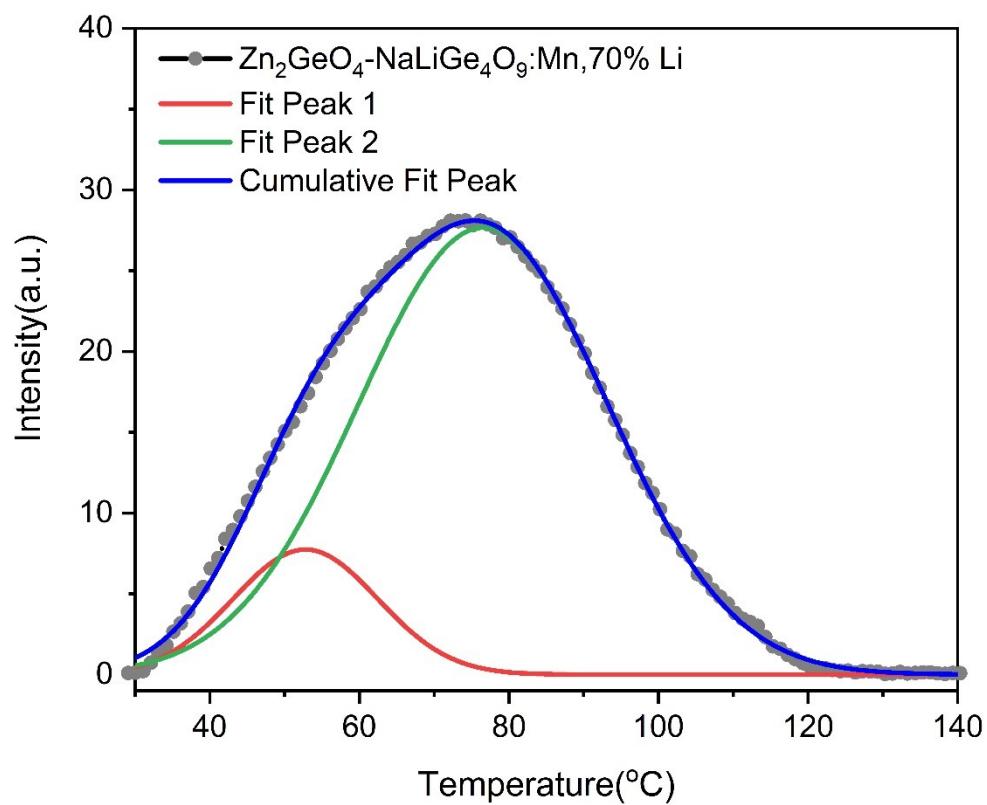

**Fig. S5** TL curves of  $\text{Zn}_2\text{GeO}_4\text{-NaLiGe}_4\text{O}_9\text{:Mn,70\%Li}$  phosphor monitored at 540 nm emission over 30–140 °C. The sample has been pre-irradiated by 365 nm UV light for 8 min.

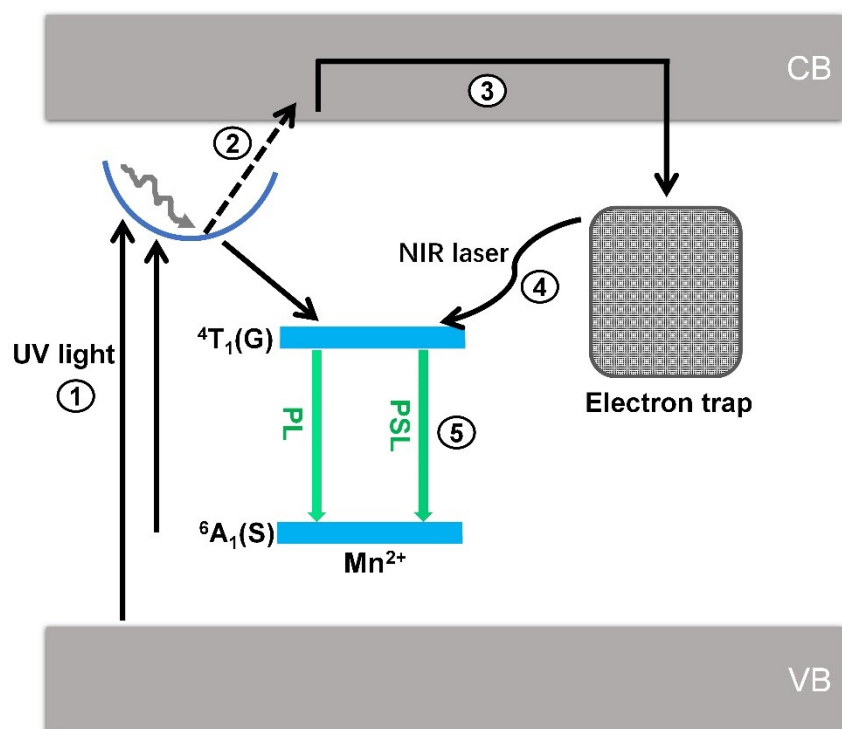

**Fig. S6** The proposed PL, PersL and PSL schematic diagram for green and red emissions of Mn<sup>2+</sup>/Mn<sup>4+</sup> in the Zn<sub>2</sub>GeO<sub>4</sub>-NaLiGe<sub>4</sub>O<sub>9</sub>:Mn phosphors. Therein, ① UV light excitation, ② energy (or electron) transfer processes, ③ trapping, ④ release and ⑤ recombination. The straight-line arrows and curved line arrows represent optical transitions and energy (or electron) transfer processes, respectively.
